# Supplementary material for: Bordetella pertussis Infection Exacerbates Influenza Virus Infection through Pertussis Toxin-Mediated Suppression of Innate Immunity
Source: PubMed Central journal article supplement (PMC3080395; doi:10.1371/journal.pone.0019016), 2011-04-20
Supplement: pone.0019016.s004.pdf [file pone.0019016.s004.pdf]

**Table S1.** Biological functions significantly affected by PT pretreatment in influenza virus-infected mice, ranked by gene count.

| 12 h                                                  |                         |                     | 36 h                                          |                         |                     |
|-------------------------------------------------------|-------------------------|---------------------|-----------------------------------------------|-------------------------|---------------------|
| Biological Function <sup>a</sup>                      | Gene Count <sup>b</sup> | p-value             | Biological Function <sup>a</sup>              | Gene Count <sup>b</sup> | p-value             |
| Hematological System Development and Function         | 16                      | 2.90E-05 - 4.73E-02 | Hematological System Development and Function | 24                      | 8.43E-11 - 3.79E-02 |
| Inflammatory Response                                 | 12                      | 6.36E-04 - 4.78E-02 | Inflammatory Response                         | 23                      | 8.60E-12 - 3.79E-02 |
| Cell-To-Cell Signaling and Interaction                | 12                      | 2.81E-05 - 4.73E-02 | Cell-To-Cell Signaling and Interaction        | 21                      | 6.65E-09 - 3.42E-02 |
| Cellular Development                                  | 11                      | 2.90E-05 - 3.72E-02 | Inflammatory Disease                          | 19                      | 9.70E-13 - 2.98E-02 |
| Cell Death                                            | 11                      | 3.08E-05 - 4.36E-02 | Cellular Movement                             | 19                      | 1.36E-12 - 3.42E-02 |
| Cellular Growth and Proliferation                     | 10                      | 2.86E-05 - 4.57E-02 | Immune Cell Trafficking                       | 19                      | 8.43E-11 - 3.42E-02 |
| Tissue Morphology                                     | 10                      | 1.51E-04 - 4.78E-02 | Tissue Development                            | 18                      | 1.30E-07 - 3.79E-02 |
| Immunological Disease                                 | 9                       | 1.49E-06 - 4.99E-02 | Hematopoiesis                                 | 17                      | 7.00E-08 - 3.42E-02 |
| Gene Expression                                       | 8                       | 3.45E-07 - 3.90E-02 | Immunological Disease Connective              | 16                      | 2.37E-11 - 3.79E-02 |
| Hematopoiesis                                         | 8                       | 1.71E-04 - 4.57E-02 | Organismal Survival                           | 16                      | 6.16E-06 - 4.56E-03 |
| Inflammatory Disease                                  | 7                       | 4.13E-04 - 4.36E-02 | Cellular Function and Maintenance             | 14                      | 1.12E-06 - 3.42E-02 |
| Skeletal and Muscular System Development and Function | 7                       | 1.51E-04 - 4.36E-02 | Antigen Presentation                          | 13                      | 2.38E-05 - 3.06E-02 |

<sup>a</sup> Functional analysis of changes in statistically significant gene expression was done using Ingenuity Systems Pathway Analysis (IPA) software.

<sup>b</sup> Genes with a fold change greater than 1.5 or more (P<0.05) of experimental group over controls.
