# Supplementary material for: Bordetella pertussis Infection Exacerbates Influenza Virus Infection through Pertussis Toxin-Mediated Suppression of Innate Immunity
Source: PubMed Central journal article supplement (PMC3080395; doi:10.1371/journal.pone.0019016), 2011-04-20
Supplement: pone.0019016.s005.pdf [file pone.0019016.s005.pdf]

**Table S2.** Genes differentially-regulated by PT pretreatment in influenza virus-infected mice at 12 h post-inoculation.

| Symbol         | Gene Annotation <sup>a</sup>                                       | Fold Change | P-value  | Accession <sup>b</sup> |
|----------------|--------------------------------------------------------------------|-------------|----------|------------------------|
| <i>PER2</i>    | period homolog 2 (Drosophila)                                      | 1.91        | 1.24E-05 | NM_011066              |
| <i>NME2</i>    | non-metastatic cells 2, protein (NM23B) expressed in               | 1.71        | 1.29E-06 | NM_001077529           |
| <i>PER1</i>    | period homolog 1 (Drosophila)                                      | 1.71        | 4.09E-03 | NM_011065              |
| <i>ADAMTS9</i> | ADAM metallopeptidase with thrombospondin type 1 motif, 9          | 1.61        | 4.89E-03 | NM_175314              |
| <i>ALAS2</i>   | aminolevulinate, delta-, synthase 2                                | 1.61        | 8.74E-05 | NM_009653              |
| <i>SLFN12</i>  | schlafen family member 12                                          | 1.61        | 2.87E-04 | AF099974               |
| <i>TEF</i>     | thyrotrophic embryonic factor                                      | 1.51        | 4.50E-02 | NM_017376              |
| <i>TNNC1</i>   | troponin C type 1 (slow)                                           | 1.51        | 1.52E-02 | NM_009393              |
| <i>AHR</i>     | aryl hydrocarbon receptor                                          | -1.51       | 4.20E-09 | NM_013464              |
| <i>CCRL2</i>   | chemokine (C-C motif) receptor-like 2                              | -1.51       | 4.62E-04 | NM_017466              |
| <i>HCLS1</i>   | hematopoietic cell-specific Lyn substrate 1                        | -1.51       | 3.62E-02 | NM_008225              |
| <i>PLEK</i>    | pleckstrin                                                         | -1.51       | 1.09E-02 | NM_019549              |
| <i>PTPN6</i>   | protein tyrosine phosphatase, non-receptor type 6                  | -1.51       | 8.52E-07 | NM_013545              |
| <i>SOX18</i>   | SRY (sex determining region Y)-box 18                              | -1.51       | 6.02E-03 | NM_009236              |
| <i>SPP1</i>    | secreted phosphoprotein 1                                          | -1.51       | 5.49E-03 | NM_009263              |
| <i>VIPR2</i>   | vasoactive intestinal peptide receptor 2                           | -1.51       | 1.08E-04 | NM_009511              |
| <i>ABCG1</i>   | ATP-binding cassette, sub-family G (WHITE), member 1               | -1.61       | 2.49E-05 | NM_009593              |
| <i>GJA4</i>    | gap junction protein, alpha 4, 37kDa                               | -1.61       | 6.26E-03 | NM_008120              |
| <i>CAPG</i>    | capping protein (actin filament), gelsolin-like                    | -1.81       | 9.88E-04 | NM_007599              |
| <i>CCL6</i>    | chemokine (C-C motif) ligand 6                                     | -1.81       | 6.21E-04 | NM_009139              |
| <i>CYBB</i>    | cytochrome b-245, beta polypeptide                                 | -1.81       | 1.02E-02 | NM_007807              |
| <i>LRG1</i>    | leucine-rich alpha-2-glycoprotein 1                                | -1.81       | 2.02E-05 | NM_029796              |
| <i>CLEC6A</i>  | C-type lectin domain family 6, member A                            | -1.91       | 4.42E-03 | NM_020001              |
| <i>CLEC7A</i>  | C-type lectin domain family 7, member A                            | -1.91       | 1.54E-03 | NM_020008              |
| <i>ITGB2</i>   | integrin, beta 2 (complement component 3 receptor 3 and 4 subunit) | -1.91       | 2.56E-02 | NM_008404              |
| <i>LCN2</i>    | lipocalin 2                                                        | -2.21       | 6.12E-05 | NM_008491              |
| <i>CCL9</i>    | chemokine (C-C motif) ligand 9                                     | -2.81       | 1.40E-06 | NM_011338              |

<sup>a</sup> Genes with a fold change greater than 1.5 or more (P<0.05) of experimental group over controls.

<sup>b</sup> GenBank accession number.
