# Supplementary material for: Bordetella pertussis Infection Exacerbates Influenza Virus Infection through Pertussis Toxin-Mediated Suppression of Innate Immunity
Source: PubMed Central journal article supplement (PMC3080395; doi:10.1371/journal.pone.0019016), 2011-04-20
Supplement: pone.0019016.s006.pdf [file pone.0019016.s006.pdf]

**Table S3.** Genes differentially-regulated by PT pretreatment in influenza virus-infected mice at 36 h post-inoculation.

| Symbol          | Gene Annotation <sup>a</sup>                                                       | Fold Change | P-value  | Accession <sup>b</sup> |
|-----------------|------------------------------------------------------------------------------------|-------------|----------|------------------------|
| <i>ELN</i>      | elastin                                                                            | 1.71        | 1.71E-05 | NM_007925              |
| <i>ZBTB16</i>   | zinc finger and BTB domain containing 16                                           | 1.71        | 2.84E-09 | NM_001033324           |
| <i>NME2</i>     | non-metastatic cells 2, protein (NM23B) expressed in                               | 1.61        | 4.56E-06 | NM_001077529           |
| <i>EIF4EBP2</i> | eukaryotic translation initiation factor 4E binding protein 2                      | 1.51        | 4.04E-02 | NM_010124              |
| <i>SOX4</i>     | SRY (sex determining region Y)-box 4                                               | 1.51        | 6.26E-03 | NM_009238              |
| <i>CCL5</i>     | chemokine (C-C motif) ligand 5                                                     | -1.51       | 1.19E-02 | NM_013653              |
| <i>CXCR2</i>    | chemokine (C-X-C motif) receptor 2                                                 | -1.51       | 1.06E-02 | NM_009909              |
| <i>GPR146</i>   | G protein-coupled receptor 146                                                     | -1.51       | 2.50E-03 | NM_001038703           |
| <i>HCK</i>      | hemopoietic cell kinase                                                            | -1.51       | 6.18E-03 | NM_010407              |
| <i>IL18BP</i>   | interleukin 18 binding protein                                                     | -1.51       | 5.63E-07 | NM_010531              |
| <i>IRGM</i>     | immunity-related GTPase family, M                                                  | -1.51       | 2.37E-02 | NM_008326              |
| <i>NAMPT</i>    | nicotinamide phosphoribosyltransferase                                             | -1.51       | 1.08E-02 | NM_021524              |
| <i>PLAUR</i>    | plasminogen activator, urokinase receptor                                          | -1.51       | 2.70E-04 | NM_011113              |
| <i>TGFB1</i>    | transforming growth factor, beta-induced, 68kDa                                    | -1.51       | 4.57E-02 | NM_009369              |
| <i>TNFAIP3</i>  | tumor necrosis factor, alpha-induced protein 3                                     | -1.51       | 2.05E-03 | NM_009397              |
| <i>VCAM1</i>    | vascular cell adhesion molecule 1                                                  | -1.51       | 4.16E-02 | NM_011693              |
| <i>CCL9</i>     | chemokine (C-C motif) ligand 9                                                     | -1.61       | 2.73E-02 | NM_011338              |
| <i>CH25H</i>    | cholesterol 25-hydroxylase                                                         | -1.61       | 6.82E-03 | NM_009890              |
| <i>DUSP1</i>    | dual specificity phosphatase 1                                                     | -1.61       | 1.79E-02 | NM_013642              |
| <i>F13A1</i>    | coagulation factor XIII, A1 polypeptide                                            | -1.61       | 3.96E-04 | NM_028784              |
| <i>HLA-E</i>    | major histocompatibility complex, class I, E                                       | -1.61       | 4.41E-04 | NM_010398              |
| <i>LCP2</i>     | lymphocyte cytosolic protein 2 (SH2 domain containing leukocyte protein of 76kDa)  | -1.61       | 3.50E-04 | NM_010696              |
| <i>MX1</i>      | myxovirus (influenza virus) resistance 1, interferon-inducible protein p78 (mouse) | -1.61       | 2.17E-02 | NR_003508              |
| <i>PLAC8</i>    | placenta-specific 8                                                                | -1.61       | 6.18E-03 | NM_139198              |
| <i>SLFN5</i>    | schlafen family member 5                                                           | -1.61       | 9.74E-06 | NM_183201              |
| <i>CD300LF</i>  | CD300 molecule-like family member f                                                | -1.71       | 1.04E-02 | NM_145634              |
| <i>CLECT7A</i>  | C-type lectin domain family 7, member A                                            | -1.71       | 1.33E-03 | NM_020008              |
| <i>CMPK2</i>    | cytidine monophosphate (UMP-CMP) kinase 2, mitochondrial                           | -1.71       | 1.82E-03 | NM_020557              |
| <i>CXCL10</i>   | chemokine (C-X-C motif) ligand 10                                                  | -1.71       | 6.00E-03 | NM_021274              |
| <i>IGTP</i>     | interferon gamma induced GTPase                                                    | -1.71       | 3.20E-03 | NM_018738              |
| <i>ITGAM</i>    | integrin, alpha M (complement component 3 receptor 3 subunit)                      | -1.71       | 4.00E-02 | NM_001082960           |
| <i>TAP1</i>     | transporter 1, ATP-binding cassette, sub-family B (MDR/TAP)                        | -1.71       | 4.29E-03 | NM_013683              |
| <i>ANKRD1</i>   | ankyrin repeat domain 1 (cardiac muscle)                                           | -1.81       | 2.01E-04 | NM_013468              |
| <i>APOBEC1</i>  | apolipoprotein B mRNA editing enzyme, catalytic polypeptide 1                      | -1.81       | 1.43E-02 | NM_031159              |
| <i>CA13</i>     | carbonic anhydrase XIII                                                            | -1.81       | 2.43E-02 | NM_024495              |
| <i>GBP2</i>     | guanylate binding protein 2, interferon-inducible                                  | -1.81       | 9.92E-03 | NM_010260              |
| <i>HSPA8</i>    | heat shock 70kDa protein 8                                                         | -1.81       | 4.48E-08 | M13967                 |

|               |                                                                                |       |          |           |
|---------------|--------------------------------------------------------------------------------|-------|----------|-----------|
| <i>IL1RN</i>  | interleukin 1 receptor antagonist                                              | -1.81 | 1.17E-03 | NM_031167 |
| <i>IFI44L</i> | interferon-induced protein 44-like                                             | -1.91 | 3.23E-02 | NM_031367 |
| <i>IFIT2</i>  | interferon-induced protein with tetratricopeptide repeats 2                    | -1.91 | 1.20E-02 | NM_008332 |
| <i>IIGP1</i>  | interferon inducible GTPase 1                                                  | -1.91 | 4.25E-04 | NM_021792 |
| <i>LILRA6</i> | leukocyte immunoglobulin-like receptor, subfamily A (with TM domain), member 6 | -1.91 | 5.83E-04 | NM_011088 |
| <i>OAS3</i>   | 2'-5'-oligoadenylate synthetase 3, 100kDa                                      | -1.91 | 4.30E-02 | NM_145226 |
| <i>PFKFB3</i> | 6-phosphofructo-2-kinase/fructose-2,6-biphosphatase 3                          | -1.91 | 7.03E-03 | NM_133232 |
| <i>CD274</i>  | CD274 molecule                                                                 | -2.01 | 1.00E-02 | NM_021893 |
| <i>THBS1</i>  | thrombospondin 1                                                               | -2.01 | 2.65E-03 | NM_011580 |
| <i>FCGR1A</i> | Fc fragment of IgG, high affinity Ia, receptor (CD64)                          | -2.11 | 7.65E-03 | NM_010186 |
| <i>FGL2</i>   | fibrinogen-like 2                                                              | -2.11 | 4.31E-03 | NM_008013 |
| <i>GBP5</i>   | guanylate binding protein 5                                                    | -2.11 | 1.54E-05 | NM_153564 |
| <i>SELP</i>   | selectin P (granule membrane protein 140kDa, antigen CD62)                     | -2.11 | 2.98E-02 | NM_011347 |
| <i>RSAD2</i>  | radical S-adenosyl methionine domain containing 2                              | -2.21 | 5.10E-03 | NM_021384 |

<sup>a</sup> Genes with a fold change greater than 1.5 or more ( $P < 0.05$ ) of experimental group over controls.

<sup>b</sup> GenBank accession number.
